# Supplementary material
Source: MDPI journal article supplement (https://www.mdpi.com/2673-4133/3/2/9)
Supplement: s1 [file s1]

**Table S1.** Hydrochemical variables at research stations of the Tashlyk reservoir.

| Variable                              | Unit                 | 60    | 61    | 61a   | IC1   | 64    | 65    |
|---------------------------------------|----------------------|-------|-------|-------|-------|-------|-------|
| Hardness                              | mmol/dm <sup>3</sup> | 9.5   | 9.6   | 9.5   | 9.4   | 9.7   | 9.8   |
| Alkalinity                            | mmol/dm <sup>3</sup> | 6.72  | 6.72  | 6.6   | 6.27  | 6.9   | 6.67  |
| HCO <sub>3</sub> <sup>-</sup>         | mg/dm <sup>3</sup>   | 359   | 359   | 354   | 358   | 366   | 356   |
| SO <sub>4</sub> <sup>2-</sup>         | mg/dm <sup>3</sup>   | 350   | 354   | 353   | 354   | 352   | 353   |
| Cl <sup>-</sup>                       | mg/dm <sup>3</sup>   | 145   | 145   | 147   | 147   | 147   | 144   |
| Ca <sup>2+</sup>                      | mg/dm <sup>3</sup>   | 48    | 44    | 44    | 44    | 42    | 42    |
| Mg <sup>2+</sup>                      | mg/dm <sup>3</sup>   | 86    | 90    | 89    | 88    | 92    | 94    |
| Na <sup>+</sup>                       | mg/dm <sup>3</sup>   | 189   | 189   | 190   | 190   | 190   | 181   |
| Dry weight                            | mg/dm <sup>3</sup>   | 1090  | 1098  | 1089  | 1115  | 1084  | 1099  |
| N-NH <sub>4</sub>                     | mgN/dm <sup>3</sup>  | 0.19  | 0.1   | 0.18  | 0.17  | 0.1   | 0.1   |
| N-NO <sub>2</sub>                     | mgN/dm <sup>3</sup>  | 0.009 | 0.009 | 0.009 | 0.012 | 0.009 | 0.009 |
| N-NO <sub>3</sub>                     | mgN/dm <sup>3</sup>  | 0.66  | 0.62  | 0.62  | 0.77  | 0.54  | 0.52  |
| P-PO <sub>4</sub>                     | mgP/dm <sup>3</sup>  | 0.016 | 0.016 | 0.023 | 0.016 | 0.016 | 0.016 |
| PI<br>(permanganate<br>oxidizability) | mg/dm <sup>3</sup>   | 6.56  | 7.04  | 7.52  | 5.76  | 7.52  | 7.04  |

Note: Hardness is the amount of dissolved calcium and magnesium in the water; Alkalinity is the water's capacity to resist changes in pH that would make the water more acidic.

**Table S2.** Hydrochemical variables at research stations of the Alexandrovskoye reservoir.

| Variable                              | Unit                 | 74   | 76   | 79   | 84   | 88   | 91   | 92   | 112  |
|---------------------------------------|----------------------|------|------|------|------|------|------|------|------|
| Hardness                              | mmol/dm <sup>3</sup> | 5.7  | 5.7  | 5.8  | 5.6  | 6.2  | 6.2  | 6.2  | 6.2  |
| Alkalinity                            | mmol/dm <sup>3</sup> | 5.29 | 5.35 | 5.10 | 5.45 | 5.45 | 5.42 | 5.75 | 5.22 |
| HCO <sub>3</sub> <sup>-</sup>         | mg/dm <sup>3</sup>   | 306  | 308  | 299  | 320  | 296  | 279  | 278  | 255  |
| SO <sub>4</sub> <sup>2-</sup>         | mg/dm <sup>3</sup>   | 92   | 94   | 91   | 95   | 94   | 94   | 95   | 95   |
| Cl <sup>-</sup>                       | mg/dm <sup>3</sup>   | 48   | 60   | 53   | 55   | 53   | 55   | 55   | 60   |
| Ca <sup>2+</sup>                      | mg/dm <sup>3</sup>   | 64   | 64   | 60   | 59   | 62   | 60   | 60   | 60   |
| Mg <sup>2+</sup>                      | mg/dm <sup>3</sup>   | 30   | 30   | 34   | 32   | 38   | 39   | 39   | 39   |
| Na <sup>+</sup>                       | mg/dm <sup>3</sup>   | 64   | 73   | 61   | 63   | 57   | 54   | 58   | 51   |
| Dry weight                            | mg/dm <sup>3</sup>   | 616  | 628  | 611  | 635  | 618  | 610  | 609  | 596  |
| N-NH <sub>4</sub>                     | mgN/dm <sup>3</sup>  | 0.38 | 0.32 | 0.38 | 0.34 | 0.51 | 0.35 | 0.62 | 0.34 |
| N-NO <sub>2</sub>                     | mgN/dm <sup>3</sup>  | 0.01 | 0.01 | 0.01 | 0.01 | 0.01 | 0.01 | 0.01 | 0.01 |
| N-NO <sub>3</sub>                     | mgN/dm <sup>3</sup>  | 0.66 | 0.58 | 0.77 | 0.83 | 0.76 | 0.52 | 0.49 | 0.45 |
| P-PO <sub>4</sub>                     | mgP/dm <sup>3</sup>  | 0.15 | 0.17 | 0.19 | 0.21 | 0.19 | 0.16 | 0.19 | 0.15 |
| PI<br>(permanganate<br>oxidizability) | mg/dm <sup>3</sup>   | 7.84 | 8.00 | 7.36 | 6.88 | 7.44 | 7.52 | 7.12 | 7.36 |

Note: Hardness is the amount of dissolved calcium and magnesium in the water; Alkalinity is the water's capacity to resist changes in pH that would make the water more acidic.

**Table S3.** Table of phytoplankton taxa with average abundance in the Tashlyk and Alexandrovskoye reservoirs with species-specific ecological preferences.

| Phylum          | Species                                                                    | Tashlyk | Alexandrovskoe | Hab | T    | OXY    | D  | Index S | SAP | HAL | pH  | AUT-HET | TRO |
|-----------------|----------------------------------------------------------------------------|---------|----------------|-----|------|--------|----|---------|-----|-----|-----|---------|-----|
| Bacillariophyta | <i>Amphora ovalis</i> (Kützing)<br>Kützing 1844                            | 3.41    | -              | B   | temp | st-str | sx | 1.5     | b   | i   | alf | ate     | e   |
| Bacillariophyta | <i>Aulacoseira granulata</i><br>(Ehrenberg) Simonsen 1979                  | -       | 12.44          | P-B | temp | st-str | es | 2.0     | b   | i   | alf | ate     | e   |
| Bacillariophyta | <i>Cocconeis placentula</i> Ehrenberg<br>1838                              | 7.50    | 1.51           | P-B | temp | st-str | es | 1.35    | o   | i   | alf | ate     | me  |
| Bacillariophyta | <i>Cyclotella meneghiniana</i> Kützing<br>1844                             | 48.02   | 2.41           | P-B | temp | st-str | sp | 2.8     | a   | hl  | alf | hne     | e   |
| Bacillariophyta | <i>Cylindrotheca closterium</i><br>(Ehrenberg) Reimann &<br>J.C.Lewin 1964 | 29.00   | 2.59           | B   | -    | -      | -  | 2.0     | b   | eh  | alf | hne     | -   |
| Bacillariophyta | <i>Halamphora veneta</i> (Kützing)<br>Levkov 2009                          | 3.64    | 2.11           | B   | temp | st-str | es | 2.6     | a-o | hl  | alf | ate     | e   |
| Bacillariophyta | <i>Navicula cryptocephala</i> Kützing<br>1844                              | 3.27    | -              | P-B | temp | st-str | es | 2.1     | b   | i   | ind | ate     | o-e |
| Bacillariophyta | <i>Nitzschia acicularis</i> (Kützing)<br>W.Smith 1853                      | 74.41   | -              | P-B | temp | st     | es | 2.7     | a-o | i   | alf | hce     | e   |
| Bacillariophyta | <i>Nitzschia fonticola</i> (Grunow)<br>Grunow 1881                         | 203.20  | -              | P-B | temp | st-str | -  | 1.5     | o-b | i   | alf | ate     | me  |
| Bacillariophyta | <i>Nitzschia holsatica</i> Hustedt 1924                                    | 137.91  | -              | P-B | -    | -      | es | 2.3     | b   | i   | ind | -       | -   |
| Bacillariophyta | <i>Nitzschia kuetzingiana</i> Hilse<br>1861                                | 663.83  | 15.44          | B   | -    | -      | es | 2.1     | b   | hl  | ind | -       | -   |
| Bacillariophyta | <i>Nitzschia paleacea</i> (Grunow)<br>Grunow 1881                          | -       | 14.34          | P-B | temp | st-str | es | 2.2     | b   | i   | alf | hce     | e   |
| Bacillariophyta | <i>Nitzschia reversa</i> W.Smith 1853                                      | 7.50    | -              | P   | -    | -      | -  | -       | -   | mh  | -   | hne     | -   |
| Bacillariophyta | <i>Nitzschia umbonata</i> (Ehrenberg)<br>Lange-Bertalot 1978               | 21.21   | -              | P-B | -    | st-str | es | 2.8     | a-o | i   | ind | hce     | e   |
| Bacillariophyta | <i>Punctastriata lancettula</i><br>(Schumann) P.B.Hamilton &<br>Siver 2008 | 21.59   | -              | P-B | cool | -      | es | 2.4     | b-a | i   | alb | ate     | om  |

|                 |                                                                    |         |        |     |      |        |    |     |     |    |     |     |    |
|-----------------|--------------------------------------------------------------------|---------|--------|-----|------|--------|----|-----|-----|----|-----|-----|----|
| Bacillariophyta | Sellaphora mutata (Krasske)<br>Lange-Bertalot 1996                 | 4.09    | -      | B   | -    | st-str | es | 1.9 | b   | hl | ind | hne | om |
| Bacillariophyta | Stephanodiscus hantzschii<br>Grunow 1880                           | 6.82    | -      | P   | temp | st-str | es | 3.6 | a-o | i  | alf | hne | he |
| Bacillariophyta | Stephanodiscus subtilis (Goor)<br>A.Cleve 1951                     | -       | 4.53   | P   | -    | st-str | -  | -   | -   | i  | -   | -   | he |
| Charophyta      | Cosmarium Corda ex Ralfs,<br>1848                                  | 257.68  | -      | -   | -    | -      | -  | -   | -   | -  | -   | -   | -  |
| Charophyta      | Staurostrum Meyen ex Ralfs,<br>1848                                | 7.27    | -      | -   | -    | -      | -  | 1.6 | b-o | -  | -   | -   | -  |
| Chlorophyta     | Actinastrum hantzschii<br>Lagerheim 1882                           | 251.39  | 14.40  | P-B | -    | st-str | -  | 2.3 | b   | i  | -   | -   | -  |
| Chlorophyta     | Ankistrodesmus arcuatus<br>Korshikov 1953                          | 105.52  | 191.89 | P-B | -    | st-str | -  | 2.1 | b   | i  | -   | -   | -  |
| Chlorophyta     | Ankyra judayi (G.M.Smith) Fott<br>1957                             | 17.71   | 6.50   | Ep  | -    | -      | -  | 2.1 | b   | -  | -   | -   | -  |
| Chlorophyta     | Binuclearia lauterbornii<br>(Schmidle) Proshkina-Lavrenko<br>1966  | 1479.73 | -      | -   | -    | -      | -  | 1.8 | o-a | -  | -   | -   | -  |
| Chlorophyta     | Chlorolobion braunii (Nägeli)<br>Komárek 1979                      | 15.00   | -      | P-B | -    | st     | -  | 1.5 | o-b | -  | -   | -   | e  |
| Chlorophyta     | Coelastrum cambricum var.<br>intermedium (Bohlin) G.S.West<br>1907 | 221.82  | -      | P   | -    | -      | -  | -   | -   | i  | -   | -   | -  |
| Chlorophyta     | Coelastrum microporum Nägeli<br>1855                               | 1045.73 | 35.56  | P-B | -    | st-str | -  | 2.3 | b   | i  | ind | -   | e  |
| Chlorophyta     | Crucigenia quadrata Morren<br>1830                                 | -       | 38.03  | P-B | -    | st-str | -  | 1.9 | o-a | i  | acf | -   | e  |
| Chlorophyta     | Desmodesmus armatus (Chodat)<br>E.H.Hegewald 2000                  | -       | 121.63 | P-B | -    | st-str | -  | 2.2 | b   | -  | -   | -   | e  |
| Chlorophyta     | Desmodesmus bicaudatus<br>(Dedusenko) P.M.Tsarenko 2000            | 249.64  | 16.89  | P-B | -    | st-str | -  | 2.2 | b   | -  | -   | -   | -  |
| Chlorophyta     | Desmodesmus intermedius<br>(Chodat) E.Hegewald 2000                | 72.18   | 36.21  | P-B | -    | st-str | -  | 2.0 | b   | -  | -   | -   | e  |

|             |                                                                    |         |        |     |   |        |   |     |     |   |     |   |   |
|-------------|--------------------------------------------------------------------|---------|--------|-----|---|--------|---|-----|-----|---|-----|---|---|
| Chlorophyta | Desmodesmus intermedius var. acutispinus (Roll) E.Hegewald 2000    | 56.45   | -      | P-B | - | st-str | - | 2.0 | b   | - | -   | - | e |
| Chlorophyta | Desmodesmus magnus (Meyen) Tsarenko 2000                           | 143.64  | -      | P   | - | -      | - | 2.1 | b   | i | -   | - | e |
| Chlorophyta | Desmodesmus opoliensis var. carinatus (Lemmermann) E.Hegewald 2000 | 102.41  | -      | P-B | - | st-str | - | 2.2 | b   | - | -   | - | e |
| Chlorophyta | Desmodesmus subspicatus (Chodat) E.Hegewald & A.W.F.Schmidt 2000   | -       | 60.44  | -   | - | -      | - | -   | -   | - | -   | - | - |
| Chlorophyta | Dictyosphaerium granulatum Hindák 1977                             | -       | 133.08 | -   | - | -      | - | -   | -   | - | -   | - | - |
| Chlorophyta | Franceia tenuispina Korshikov 1953                                 | -       | 2.06   | -   | - | -      | - | -   | -   | - | -   | - | - |
| Chlorophyta | Golenkinia radiata Chodat 1894                                     | 63.24   | -      | P-B | - | st-str | - | 1.9 | o-a | i | -   | - | e |
| Chlorophyta | Kirchneriella lunaris (Kirchner) Möbius 1894                       | 208.21  | 493.61 | P-B | - | st-str | - | 1.8 | o-a | i | -   | - | e |
| Chlorophyta | Lagerheimia ciliata (Lagerheim) Chodat 1895                        | 70.08   | -      | P-B | - | st-str | - | 2.0 | b   | - | -   | - | e |
| Chlorophyta | Lemmermannia tetrapedia (Kirchner) Lemmermann 1904                 | -       | 87.48  | P-B | - | st-str | - | 2.0 | b   | i | ind | - | e |
| Chlorophyta | Micractinium bornhemense (W.Conrad) Korshikov 1953                 | 104.73  | -      | -   | - | -      | - | -   | -   | - | -   | - | - |
| Chlorophyta | Micractinium pusillum Fresenius 1858                               | 1035.64 | -      | P-B | - | st-str | - | 2.6 | a-o | - | -   | - | e |
| Chlorophyta | Monoraphidium contortum (Thuret) Komárková-Legnerová 1969          | 3.64    | 60.29  | P-B | - | st-str | - | 2.2 | b   | i | -   | - | - |
| Chlorophyta | Oocystis borgei J.W.Snow 1903                                      | 184.18  | 8.22   | P-B | - | st-str | - | 1.9 | o-a | i | ind | - | e |
| Chlorophyta | Pandorina morum (O.F.Müller) Bory 1826                             | -       | 106.67 | P   | - | st     | - | 2.3 | b   | i | -   | - | e |
| Chlorophyta | Pediastrum duplex Meyen 1829                                       | 337.45  | -      | P   | - | st-str | - | 2.1 | b   | i | ind | - | e |
| Chlorophyta | Phacotus cocifer Korshikov 1938                                    | 2.06    | 11.00  | -   | - | -      | - | -   | -   | - | -   | - | - |

|             |                                                                                    |        |        |       |   |        |   |      |     |   |     |     |    |
|-------------|------------------------------------------------------------------------------------|--------|--------|-------|---|--------|---|------|-----|---|-----|-----|----|
| Chlorophyta | <i>Pseudodidymocystis planctonica</i><br>(Korshikov) E.Hegewald &<br>Deason 1989   | 98.82  | 276.49 | -     | - | -      | - | 1.8  | o-a | - | -   | -   | -  |
| Chlorophyta | <i>Pteromonas meyeriana</i><br>N.M.Kabanov 1928                                    | -      | 46.67  | -     | - | -      | - | -    | -   | - | -   | -   | -  |
| Chlorophyta | <i>Scenedesmus ellipticus</i> Corda<br>1835                                        | -      | 16.89  | P-B,S | - | st-str | - | 1.7  | b-o | - | -   | -   | -  |
| Chlorophyta | <i>Scenedesmus quadricauda</i><br>(Turpin) Brébisson 1835                          | 260.15 | 45.00  | P     | - | -      | - | 2.1  | b   | i | -   | -   | e  |
| Chlorophyta | <i>Schroederia setigera</i> (Schröder)<br>Lemmermann 1898                          | 78.09  | 33.92  | P     | - | st-str | - | 1.7  | b-o | i | alf | -   | e  |
| Chlorophyta | <i>Stauridium tetras</i> (Ehrenberg)<br>E.Hegewald 2005                            | 19.64  | 38.52  | P-B   | - | st-str | - | 2.1  | b   | i | ind | -   | e  |
| Chlorophyta | <i>Tetrachlorella alternans</i><br>(G.M.Smith) Korshikov 1939                      | -      | 29.56  | P-B   | - | -      | - | 1.9  | o-a | - | -   | -   | -  |
| Chlorophyta | <i>Tetradesmus lagerheimii</i><br>M.J.Wynne & Guiry 2016                           | 19.88  | 16.70  | P-B   | - | st-str | - | 2.15 | b   | i | ind | -   | e  |
| Chlorophyta | <i>Tetradesmus obliquus</i> (Turpin)<br>M.J.Wynne 2016                             | -      | 25.50  | P-B,S | - | st-str | - | 2.4  | b   | i | ind | -   | ot |
| Chlorophyta | <i>Tetraëdron triangulare</i><br>Korshikov 1953                                    | -      | 9.19   | P-B   | - | st-str | - | 2.0  | b   | i | -   | -   | e  |
| Chlorophyta | <i>Tetrastrum staurogeniiforme</i><br>(Schröder) Lemmermann 1900                   | 13.64  | 83.23  | P-B   | - | st-str | - | 2.2  | b   | i | -   | -   | e  |
| Chlorophyta | <i>Treubaria planctonica</i><br>(G.M.Smith) Korshikov 1953                         | 4.09   | -      | P     | - | st     | - | 1.9  | o-a | - | -   | -   | -  |
| Chlorophyta | <i>Treubaria triappendiculata</i><br>C.Bernard 1908                                | 8.29   | -      | P-B   | - | st-str | - | -    | -   | - | -   | -   | -  |
| Chlorophyta | <i>Willea apiculata</i> (Lemmermann)<br>D.M.John, M.J.Wynne &<br>P.M.Tsarenko 2014 | 72.97  | 104.53 | P-B   | - | st-str | - | 2.2  | b   | - | -   | -   | e  |
| Cryptophyta | <i>Cryptomonas</i> Ehrenberg, 1831                                                 | 46.91  | 203.59 | P     | - | -      | - | 2.2  | b   | - | -   | hne | -  |
| Cryptophyta | <i>Rhodomonas pusilla</i><br>(H.Bachmann) Javornicky 1967                          | 540.42 | 135.77 | P     | - | -      | - | 1.7  | b-o | - | -   | -   | -  |

|               |                                                                                                           |         |           |     |   |        |   |      |     |    |     |   |    |
|---------------|-----------------------------------------------------------------------------------------------------------|---------|-----------|-----|---|--------|---|------|-----|----|-----|---|----|
| Cyanobacteria | Aphanizomenon flosaquae Ralfs<br>ex Bornet & Flahault 1886                                                | -       | 9403.31   | P-B | - | -      | - | 1.95 | o-a | hl | alb | - | m  |
| Cyanobacteria | Aphanocapsa incerta<br>(Lemmermann) G.Cronberg &<br>Komárek 1994                                          | 4743.94 | 7464.44   | P-B | - | -      | - | 2.2  | b   | i  | -   | - | me |
| Cyanobacteria | Dolichospermum flosaquae<br>(Brébisson ex Bornet & Flahault)<br>P.Wacklin, L.Hoffmann &<br>J.Komárek 2009 | -       | 1065.76   | P-B | - | st     | - | 2.0  | b   | i  | alb | - | e  |
| Cyanobacteria | Merismopedia minima G.Beck<br>1897                                                                        | 7153.21 | -         | B,S | - | aer    | - | -    | -   | -  | -   | - | ot |
| Cyanobacteria | Microcystis aeruginosa (Kützing)<br>Kützing 1846                                                          | 631.14  | 146280.56 | P-B | - | -      | - | 2.1  | b   | hl | acf | - | e  |
| Miozoa        | Gymnodinium F.Stein, 1878                                                                                 | -       | 18.88     | P   | - | -      | - | 1.5  | o-b | -  | -   | - | -  |
| Ochrophyta    | Centritractus belonophorus<br>(Schmidle) Lemmermann 1900                                                  | -       | 4.52      | P   | - | st-str | - | 1.3  | o   | -  | -   | - | e  |

Note: Abbreviation of the ecological groups. Habitat: P—planktonic; P-B—plankto benthic; B—benthic; S—soil; Ep—epiphyte. Temperature: cool—cool water; temp—temperate temperature; eterm—eurythermic. Oxygenation and water moving (Oxygen): st—standing water; st-str—low streaming water; aer—aerophiles. Halobity degree (Salinity): i—oligothalobes—indifferent; hl—halophiles; mh—masohalobes; eh—euhalobe. Acidity (pH): alf—alkaliphiles; ind—indifferent; acf—acidophiles; alb—alkalibiontes. Organic pollution indicators according to Watanabe (D): sx—saproxenes; es—eurysaprobates; sp—saprophiles. Saprobity (Sap): o—oligosaprob; o-b—oligo-beta-mesosaprob; b-o—beta-oligosaprob; o-a—oligo-alpha-mesosaprob; b—beta-mesosaprob; b-a—beta-alpha-mesosaprob; a-o—alpha-oligosaprob; a—alpha-mesosaprob. Nitrogen uptake metabolism (Aut-Het): ate—nitrogen-autotrophic taxa, tolerating elevated concentrations of organically bound nitrogen; hne—facultatively nitrogen-heterotrophic taxa, needing periodically elevated concentrations of organically bound nitrogen; hce—facultatively nitrogen-heterotrophic taxa, needing elevated concentrations of organically bound nitrogen. Trophic state (Tro): ot—oligotraphentic; om—oligo-mesotraphentic; m—mesotraphentic; me—meso-eutraphentic; e—eutraphentic; o-e—oligo-eutraphentic; he—hypereutraphentic. “—” property is unknown

**Table S4.** Distribution of phytoplankton species abundance (thousand cells in dm3) in phytoplankton over sampling stations in the Tashlyk and Alexandrovskoye reservoirs.

| Phylum          | Species                                                       | Code   | Tashlyk |     |      |      |      |      |     |     |     |    | Alexandrovskoye |     |     |    |     |  |
|-----------------|---------------------------------------------------------------|--------|---------|-----|------|------|------|------|-----|-----|-----|----|-----------------|-----|-----|----|-----|--|
|                 |                                                               |        | 60      | 61  | 61a  | IC-1 | 63   | 64   | 65  | 74  | 76  | 79 | 88              | 84  | 91  | 92 | 112 |  |
| Bacillariophyta | Aulacoseira granulata (Ehrenberg) Simonsen 1979               | AulGra | 0       | 0   | 0    | 0    | 0    | 0    | 0   | 0   | 0   | 0  | 0               | 0   | 0   | 37 | 75  |  |
| Bacillariophyta | Cocconeis placentula Ehrenberg 1838                           | CocPla | 0       | 45  | 0    | 0    | 0    | 0    | 0   | 0   | 0   | 14 | 0               | 0   | 0   | 0  | 0   |  |
| Bacillariophyta | Cyclotella meneghiniana Kützing 1844                          | CycMen | 55      | 45  | 120  | 23   | 80   | 72   | 0   | 0   | 22  | 0  | 0               | 0   | 0   | 0  | 0   |  |
| Bacillariophyta | Cylindrotheca closterium (Ehrenberg) Reimann & J.C.Lewin 1964 | CylClo | 0       | 0   | 0    | 0    | 0    | 72   | 40  | 0   | 0   | 0  | 0               | 23  | 0   | 0  | 0   |  |
| Bacillariophyta | Halamphora veneta (Kützing) Levkov 2009                       | HalVen | 0       | 0   | 40   | 0    | 0    | 0    | 0   | 0   | 0   | 0  | 19              | 0   | 0   | 0  | 0   |  |
| Bacillariophyta | Navicula cryptocephala Kützing 1844                           | NavCry | 0       | 0   | 0    | 0    | 0    | 36   | 0   | 0   | 0   | 0  | 0               | 0   | 0   | 0  | 0   |  |
| Bacillariophyta | Nitzschia acicularis (Kützing) W.Smith 1853                   | NitAci | 193     | 90  | 120  | 68   | 120  | 0    | 0   | 0   | 0   | 0  | 0               | 0   | 0   | 0  | 0   |  |
| Bacillariophyta | Nitzschia fonticola (Grunow) Grunow 1881                      | NitFon | 908     | 540 | 0    | 23   | 0    | 72   | 0   | 0   | 0   | 0  | 0               | 0   | 0   | 0  | 0   |  |
| Bacillariophyta | Nitzschia holsatica Hustedt 1924                              | NitHol | 0       | 0   | 0    | 0    | 0    | 1008 | 440 | 0   | 0   | 0  | 0               | 0   | 0   | 0  | 0   |  |
| Bacillariophyta | Nitzschia kuetzingiana Hilse 1861                             | NitKue | 605     | 495 | 1360 | 567  | 1440 | 396  | 560 | 0   | 0   | 0  | 19              | 0   | 120 | 0  | 0   |  |
| Bacillariophyta | Nitzschia paleacea (Grunow) Grunow 1881                       | NitPal | 0       | 0   | 0    | 0    | 0    | 0    | 0   | 62  | 0   | 0  | 0               | 0   | 0   | 19 | 0   |  |
| Bacillariophyta | Nitzschia reversa W.Smith 1853                                | NitRev | 83      | 0   | 0    | 0    | 0    | 0    | 0   | 0   | 0   | 0  | 0               | 0   | 0   | 0  | 0   |  |
| Bacillariophyta | Nitzschia umbonata (Ehrenberg) Lange-Bertalot 1978            | NitUmb | 0       | 0   | 120  | 113  | 0    | 0    | 0   | 0   | 0   | 0  | 0               | 0   | 0   | 0  | 0   |  |
| Bacillariophyta | Punctastriata lancettula (Schumann) P.B.Hamilton & Siver 2008 | PunLan | 110     | 90  | 0    | 0    | 0    | 0    | 0   | 0   | 0   | 0  | 0               | 0   | 0   | 0  | 0   |  |
| Bacillariophyta | Sellaphora mutata (Krasske) Lange-Bertalot 1996               | SelMut | 0       | 45  | 0    | 0    | 0    | 0    | 0   | 0   | 0   | 0  | 0               | 0   | 0   | 0  | 0   |  |
| Bacillariophyta | Stephanodiscus subtilis (Goor) A.Cleve 1951                   | SteSub | 0       | 0   | 0    | 0    | 0    | 0    | 0   | 0   | 0   | 41 | 0               | 0   | 0   | 0  | 0   |  |
| Charophyta      | Cosmarium Corda ex Ralfs, 1848                                | Cosmar | 165     | 360 | 160  | 68   | 560  | 432  | 320 | 0   | 0   | 0  | 0               | 0   | 0   | 0  | 0   |  |
| Charophyta      | Staurostrum Meyen ex Ralfs, 1848                              | Staura | 0       | 0   | 0    | 0    | 40   | 0    | 40  | 0   | 0   | 0  | 0               | 0   | 0   | 0  | 0   |  |
| Chlorophyta     | Actinastrum hantzschii Lagerheim 1882                         | ActHan | 0       | 360 | 640  | 181  | 480  | 576  | 0   | 0   | 0   | 0  | 0               | 0   | 0   | 0  | 0   |  |
| Chlorophyta     | Ankistrodesmus arcuatus Korshikov 1953                        | AnkArc | 110     | 135 | 160  | 91   | 160  | 108  | 40  | 351 | 390 | 0  | 779             | 187 | 20  | 0  | 0   |  |
| Chlorophyta     | Ankyra judayi (G.M.Smith) Fott 1957                           | AnkJud | 0       | 45  | 40   | 45   | 0    | 36   | 0   | 0   | 0   | 0  | 0               | 0   | 40  | 19 | 0   |  |
| Chlorophyta     | Binuclearia lauterbornii (Schmidle) Proshkina-Lavrenko 1966   | BinLau | 4483    | 720 | 1920 | 1360 | 80   | 1944 | 240 | 0   | 0   | 0  | 0               | 0   | 0   | 0  | 0   |  |
| Chlorophyta     | Chlorolobion braunii (Nägeli) Komárek 1979                    | ChlBra | 0       | 90  | 0    | 0    | 0    | 0    | 0   | 0   | 0   | 0  | 0               | 0   | 0   | 0  | 0   |  |
| Chlorophyta     | Coelastrum cambricum var. intermedium (Bohlin) G.S.West 1907  | CoeCam | 0       | 720 | 0    | 0    | 0    | 0    | 640 | 0   | 0   | 0  | 0               | 0   | 0   | 0  | 0   |  |

|             |                                                                     |         |     |      |      |    |      |      |      |     |      |     |      |     |     |    |     |
|-------------|---------------------------------------------------------------------|---------|-----|------|------|----|------|------|------|-----|------|-----|------|-----|-----|----|-----|
| Chlorophyta | Coelastrum microporum Nägeli 1855                                   | CoeMicr | 880 | 2295 | 1280 | 0  | 3200 | 2016 | 1280 | 0   | 0    | 0   | 0    | 0   | 320 | 0  | 0   |
| Chlorophyta | Crucigenia quadrata Morren 1830                                     | CruQua  | 0   | 0    | 0    | 0  | 0    | 0    | 0    | 0   | 87   | 218 | 38   | 0   | 0   | 0  | 0   |
| Chlorophyta | Desmodesmus armatus (Chodat) E.H.Hegewald 2000                      | DesArm  | 0   | 0    | 0    | 0  | 0    | 0    | 0    | 351 | 650  | 0   | 0    | 93  | 0   | 0  | 0   |
| Chlorophyta | Desmodesmus bicaudatus (Dedusenko) P.M.Tsarenko 2000                | DesBic  | 220 | 900  | 480  | 0  | 160  | 288  | 320  | 0   | 0    | 0   | 152  | 0   | 0   | 0  | 0   |
| Chlorophyta | Desmodesmus intermedius (Chodat) E.Hegewald 2000                    | DesInt  | 330 | 0    | 320  | 0  | 0    | 144  | 0    | 83  | 0    | 163 | 0    | 0   | 80  | 0  | 0   |
| Chlorophyta | Desmodesmus magnus (Meyen) Tsarenko 2000                            | DesMag  | 0   | 180  | 440  | 0  | 320  | 144  | 160  | 0   | 0    | 0   | 0    | 0   | 0   | 0  | 0   |
| Chlorophyta | Desmodesmus opoliensis var. carinatus (Lemmermann) E.Hegewald 2000  | DesOpo  | 330 | 0    | 0    | 0  | 0    | 0    | 0    | 0   | 0    | 0   | 0    | 0   | 0   | 0  | 0   |
| Chlorophyta | Desmodesmus subspicatus (Chodat) E.Hegewald & A.W.F.Schmidt 2000    | DesSub  | 0   | 0    | 0    | 0  | 0    | 0    | 0    | 186 | 130  | 0   | 228  | 0   | 0   | 0  | 0   |
| Chlorophyta | Dictyosphaerium granulatum Hindák 1977                              | DycGra  | 0   | 0    | 0    | 0  | 0    | 0    | 0    | 0   | 303  | 54  | 0    | 0   | 640 | 0  | 200 |
| Chlorophyta | Franceia tenuispina Korshikov 1953                                  | FraTen  | 0   | 0    | 0    | 0  | 0    | 0    | 0    | 0   | 0    | 0   | 0    | 0   | 0   | 19 | 0   |
| Chlorophyta | Golenkinia radiata Chodat 1894                                      | GolRad  | 55  | 135  | 0    | 23 | 40   | 144  | 80   | 0   | 0    | 0   | 0    | 0   | 0   | 0  | 0   |
| Chlorophyta | Kirchneriella lunaris (Kirchner) Möbius 1894                        | KirLun  | 330 | 90   | 120  | 45 | 520  | 360  | 360  | 641 | 1062 | 748 | 1387 | 467 | 120 | 19 | 0   |
| Chlorophyta | Lagerheimia ciliata (Lagerheim) Chodat 1895                         | LagCil  | 28  | 135  | 0    | 45 | 40   | 144  | 40   | 0   | 0    | 0   | 0    | 0   | 0   | 0  | 0   |
| Chlorophyta | Lemmermannia tetrapedia (Kirchner) Lemmermann 1904                  | LemTet  | 0   | 0    | 0    | 0  | 0    | 0    | 0    | 351 | 173  | 0   | 76   | 187 | 0   | 0  | 0   |
| Chlorophyta | Micractinium bornhemense (W.Conrad) Korshikov 1953                  | MicBor  | 0   | 0    | 0    | 0  | 0    | 1152 | 0    | 0   | 0    | 0   | 0    | 0   | 0   | 0  | 0   |
| Chlorophyta | Micractinium pusillum Fresenius 1858                                | MicPus  | 0   | 2520 | 1280 | 0  | 0    | 864  | 1280 | 0   | 0    | 0   | 0    | 0   | 0   | 0  | 0   |
| Chlorophyta | Monoraphidium contortum (Thuret) Komárková-Legnerová 1969           | MonCon  | 0   | 0    | 40   | 0  | 0    | 0    | 0    | 0   | 0    | 218 | 0    | 0   | 300 | 0  | 25  |
| Chlorophyta | Oocystis borgei J.W.Snow 1903                                       | OocBor  | 550 | 180  | 320  | 0  | 160  | 144  | 0    | 0   | 0    | 0   | 0    | 0   | 0   | 74 | 0   |
| Chlorophyta | Pandorina morum (O.F.Müller) Bory 1826                              | PanMor  | 0   | 0    | 0    | 0  | 0    | 0    | 0    | 0   | 0    | 0   | 0    | 0   | 960 | 0  | 0   |
| Chlorophyta | Pediastrum duplex Meyen 1829                                        |         |     |      |      |    | 2560 |      |      |     |      |     |      |     |     |    |     |
| Chlorophyta | Phacotus coccifer Korshikov 1938                                    | PhaCoc  | 0   | 0    | 0    | 23 | 0    | 0    | 0    | 0   | 0    | 0   | 0    | 0   | 0   | 74 | 25  |
| Chlorophyta | Pseudodidymocystis planctonica (Korshikov) E.Hegewald & Deason 1989 | PsePla  | 220 | 0    | 0    | 0  | 160  | 144  | 320  | 579 | 347  | 462 | 874  | 187 | 40  | 0  | 0   |
| Chlorophyta | Pteromonas meyeriana N.M.Kabanov 1928                               | PteMey  | 0   | 0    | 0    | 0  | 0    | 0    | 0    | 0   | 0    | 0   | 0    | 0   | 420 | 0  | 0   |
| Chlorophyta | Scenedesmus ellipticus Corda 1835                                   | SceEll  | 0   | 0    | 0    | 0  | 0    | 0    | 0    | 0   | 0    | 0   | 152  | 0   | 0   | 0  | 0   |



|               |                                                                                                  |         |      |      |      |      |       |       |       |     |     |     |      |      |       |       |        |
|---------------|--------------------------------------------------------------------------------------------------|---------|------|------|------|------|-------|-------|-------|-----|-----|-----|------|------|-------|-------|--------|
| Chlorophyta   | Scenedesmus quadricauda (Turpin) Brébisson 1835                                                  | SceQua  | 275  | 630  | 680  | 295  | 160   | 432   | 240   | 0   | 0   | 272 | 133  | 0    | 0     | 0     | 0      |
| Chlorophyta   | Schroederia setigera (Schröder) Lemmermann 1898                                                  | ShrSet  | 248  | 135  | 0    | 0    | 160   | 72    | 120   | 0   | 0   | 0   | 0    | 0    | 160   | 56    | 25     |
| Chlorophyta   | Stauridium tetras (Ehrenberg) E.Hegewald 2005                                                    | StaTet  | 0    | 0    | 0    | 0    | 0     | 216   | 0     | 0   | 347 | 0   | 0    | 0    | 0     | 0     | 0      |
| Chlorophyta   | Tetrachlorella alternans (G.M.Smith) Korshikov 1939                                              | TetAlt  | 0    | 0    | 0    | 0    | 0     | 0     | 0     | 0   | 0   | 0   | 266  | 0    | 0     | 0     | 0      |
| Chlorophyta   | Tetradesmus lagerheimii M.J.Wynne & Guiry 2016                                                   | TetLag  | 0    | 0    | 0    | 159  | 0     | 0     | 0     | 0   | 0   | 0   | 76   | 0    | 0     | 74    | 0      |
| Chlorophyta   | Tetradesmus obliquus (Turpin) M.J.Wynne 2016                                                     | TetObl  | 0    | 0    | 0    | 0    | 0     | 0     | 0     | 83  | 0   | 109 | 38   | 0    | 0     | 0     | 0      |
| Chlorophyta   | Tetraëdron triangulare Korshikov 1953                                                            | TetTri  | 0    | 0    | 0    | 0    | 0     | 0     | 0     | 83  | 0   | 0   | 0    | 0    | 0     | 0     | 0      |
| Chlorophyta   | Tetrastrum staurogeniiforme (Schröder) Lemmermann 1900                                           | TetSta  | 0    | 0    | 0    | 0    | 0     | 0     | 0     | 0   | 173 | 326 | 76   | 93   | 80    | 0     | 0      |
| Chlorophyta   | Treubaria planctonica (G.M.Smith) Korshikov 1953                                                 | TrePla  | 0    | 45   | 0    | 0    | 0     | 0     | 0     | 0   | 0   | 0   | 0    | 0    | 0     | 0     | 0      |
| Chlorophyta   | Treubaria triappendiculata C.Bernard 1908                                                        | TreApp  | 0    | 0    | 40   | 23   | 0     | 0     | 0     | 0   | 0   | 0   | 0    | 0    | 0     | 0     | 0      |
| Chlorophyta   | Willea apiculata (Lemmermann) D.M.John, M.J.Wynne & P.M.Tsarenko 2014                            | WilApi  | 440  | 0    | 0    | 363  | 0     | 0     | 0     | 413 | 173 | 109 | 152  | 93   | 0     | 0     | 0      |
| Cryptophyta   | Cryptomonas Ehrenberg, 1831                                                                      | Crypto  | 0    | 45   | 0    | 0    | 240   | 216   | 0     | 0   | 0   | 0   | 0    | 187  | 600   | 592   | 0      |
| Cryptophyta   | Rhodomonas pusilla (H.Bachmann) Javornicky 1967                                                  | RhoPus  | 1238 | 135  | 80   | 363  | 120   | 576   | 1920  | 0   | 130 | 490 | 95   | 233  | 200   | 74    | 0      |
| Cyanobacteria | Aphanizomenon flosaquae Ralfs ex Bornet & Flahault 1886                                          | AphFlo  | 0    | 0    | 0    | 0    | 0     | 0     | 0     | 0   | 0   | 0   | 0    | 0    | 160   | 21645 | 57900  |
| Cyanobacteria | Aphanocapsa incerta (Lemmermann) G.Cronberg & Komárek 1994                                       | AphInse | 5500 | 9900 | 2800 | 1813 | 5200  | 12600 | 6000  | 0   | 0   | 0   | 0    | 0    | 0     | 64750 | 0      |
| Cyanobacteria | Dolichospermum flosaquae (Brébisson ex Bornet & Flahault) P.Wacklin, L.Hoffmann & J.Komárek 2009 | DolFlo  | 0    | 0    | 0    | 0    | 0     | 0     | 0     | 0   | 0   | 0   | 0    | 0    | 640   | 4995  | 3325   |
| Cyanobacteria | Merismopedia minima G.Beck 1897                                                                  | MerMin  | 1320 | 5040 | 3200 | 725  | 29120 | 8352  | 11200 | 0   | 0   | 0   | 0    | 0    | 0     | 0     | 0      |
| Cyanobacteria | Microcystis aeruginosa (Kützing) Kützing 1846                                                    | MicAer  | 1348 | 0    | 0    | 0    | 480   | 3528  | 0     | 0   | 0   | 68  | 3914 | 3080 | 81480 | ##### | 811900 |
| Miozoa        | Gymnodinium F.Stein, 1878                                                                        | Gymnod  | 0    | 0    | 0    | 0    | 0     | 0     | 0     | 0   | 0   | 0   | 19   | 0    | 100   | 19    | 0      |
| Ochrophyta    | Centritractus belonophorus (Schmidle) Lemmermann 1900                                            | CenBel  | 0    | 0    | 0    | 0    | 0     | 0     | 0     | 0   | 22  | 0   | 19   | 0    | 0     | 0     | 0      |
